# Supplementary material for: An ultra-stable cytoplasmic antibody engineered for in vivo applications
Source: PubMed Central journal article supplement (PMC6969036; doi:10.1038/s41467-019-13654-9), 2020-01-17
Supplement: 41467_2019_13654_MOESM1_ESM.pdf [file 41467_2019_13654_MOESM1_ESM.pdf]

# **An ultra-stable cytoplasmic antibody engineered for *in vivo* applications**

Kabayama *et al.*

Supplementary Information (8 figures, 3 tables)

# Supplementary Figure 1

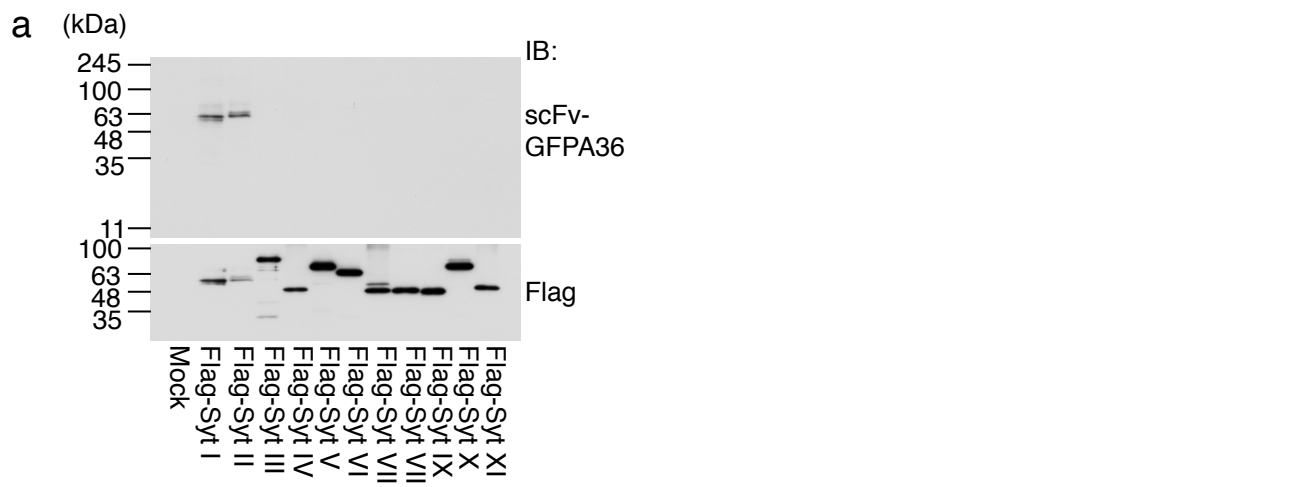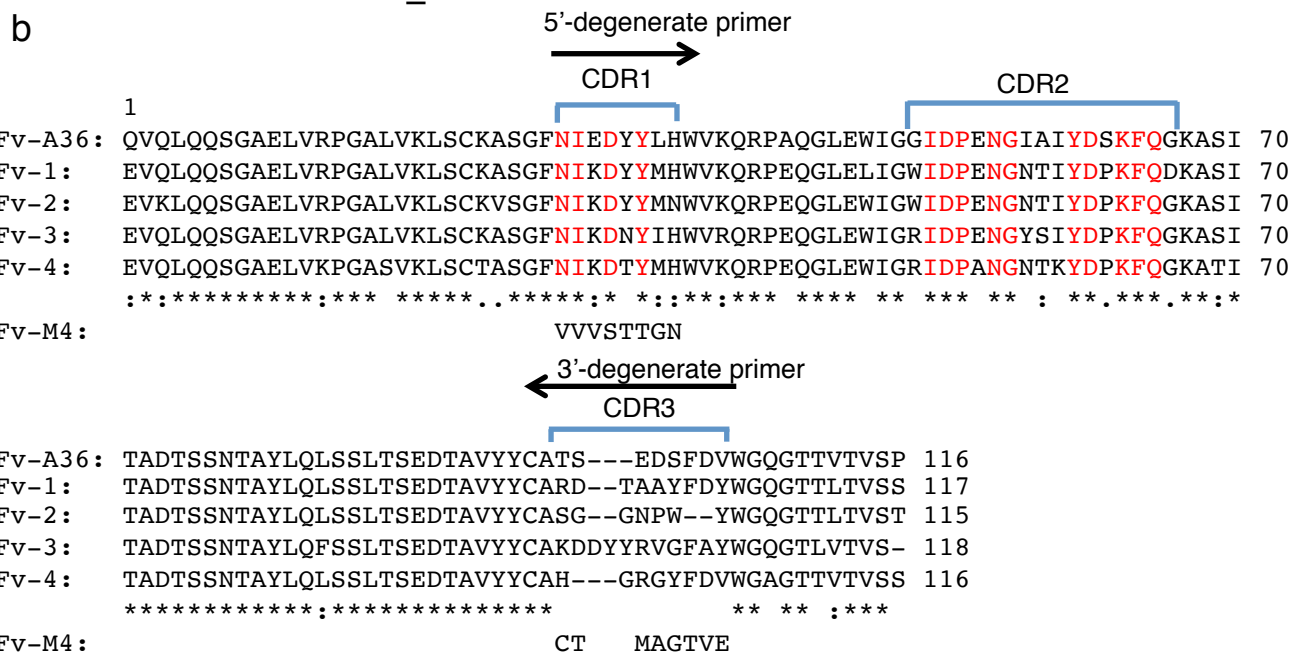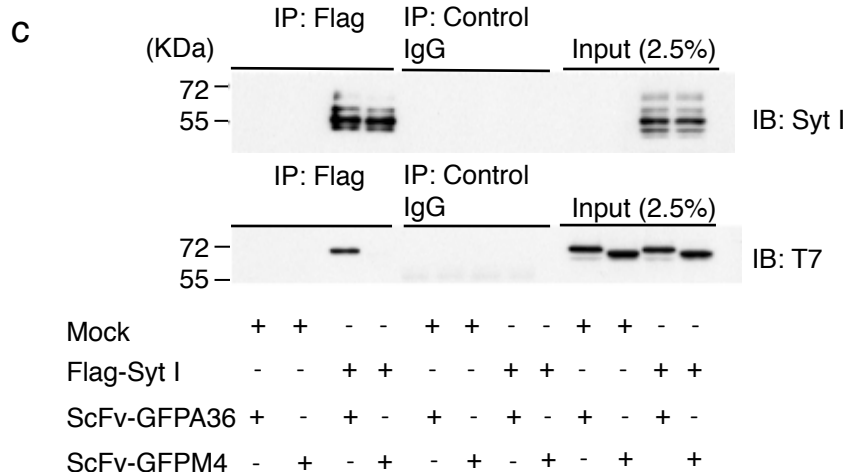

### Supplementary Figure 1.

**Isolation of scFv-A36 specifically binding to the C2A domain of Syt I/II.** (A) Western blot analysis of COS-7 cells expressing Flag-tagged full-length Syt I–XI using purified scFv-GFPA36 as the primary antibody; immunoreactive bands were visualised with anti-GFP antibody and HRP-labelled anti-rabbit antibodies (upper panel). Blots were reprobbed with anti-Flag antibody (lower panel). (B) Multiple alignments of amino-acid sequences of VH of 6 scFvs: ScFv-A36 (accession no. AB472376), ScFv-1 (anti-tissue factor D3; accession no. 1K6Q\_H), ScFv-2 (anti-white spot syndrome virus; accession no. AAY88907), ScFv-3 (anti-S antigen of hepatitis B virus; accession no. AAD34865), and ScFv-4 (immunoglobulin heavy chain; accession no. AAA16587), and scFv-A36 mutant (termed scFv-M4). Residues identical to A36 in CDRs are shown in red letters. Asterisks indicate amino-acid residues conserved among the 6 scFv proteins. Note that only the amino-acid sequences of CDR1 and CDR3 are shown for scFv-M4. Nucleotide sequences of CDR1 and CDR3 were mutated by PCR with degenerate primers (arrows). (C) Intracellular binding of ScFv-GFPA36, but not of scFv-GFPM4, with Flag-Syt I expressed in COS7 cells. Immunoprecipitates obtained with anti-Flag (M2) antibody were analysed using western blotting with anti-Syt I (SYA148) antibody and HRP-labelled anti-T7 antibody to detect scFv proteins. The predicted molecular weight of ScFv-GFPM4 is slightly less than that of scFv-GFPA36 (A36: 55733.82; M4: 55355.63). In addition, CDR1 and CDR3 of A36 are relatively acidic and residue-rich (5 in 16 residues), while those of M4 are not (1 in 16 residues). The binding of SDS to acidic or basic amino-acid residues is relatively weak compared to other amino acids, affecting the migration distance of acidic or basic residue-rich proteins (e.g., histone proteins) in SDS-PAGE. This raises the possibility that the difference in net negative charge of CDR1 and CDR3 of STAND-A36 (−5.1 at pH 7.4) and STAND-M4 (−1.3 at pH 7.4) might affect their migration in SDS-PAGE.

# Supplementary Figure 2

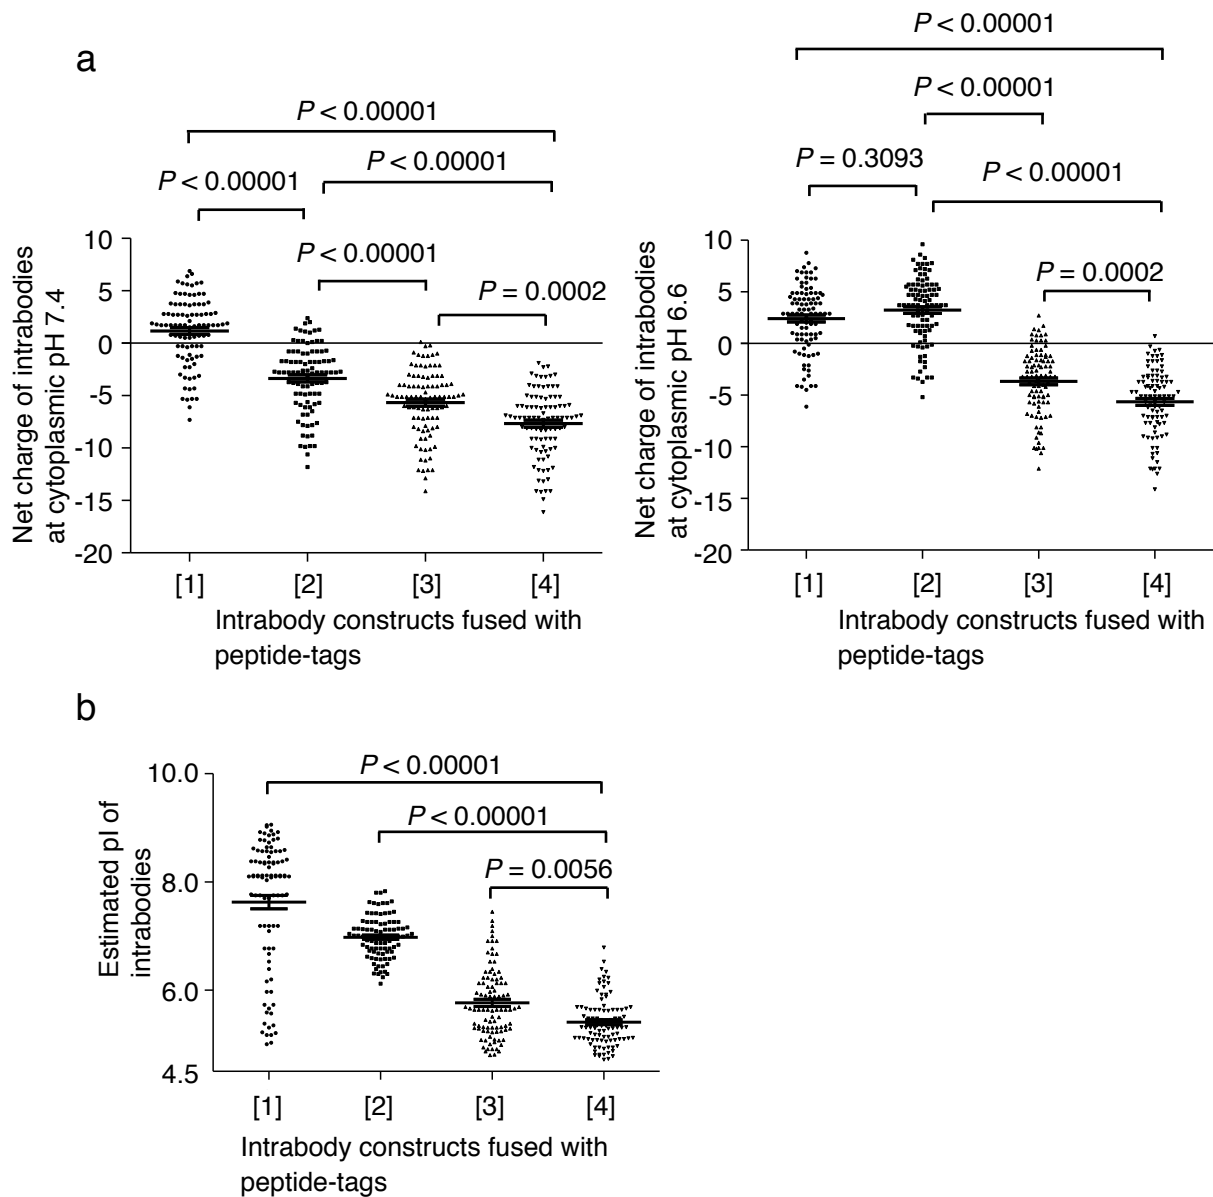

## Supplementary Figure 2.

**Comparison of the net charge of 94 scFv proteins fused with different peptide tags.** (a) Net charge of 94 scFv proteins obtained using a BLAST search for scFv-A36 (Supplementary Table 2) at cytoplasmic pH 7.4 (left panel) and pH 6.6 (right panel). Intrabody constructs fused with peptide tags are described in Fig. 1a. (b) Average pI of 94 scFv proteins fused with indicated peptide tags as described in (a). Statistical analyses were performed using two-tailed one-way ANOVA and Tukey's post hoc multiple comparisons test (Supplementary Table 1). Error bars represent standard error of the mean. Source data are provided as a Source Data file.

# Supplementary Figure 3

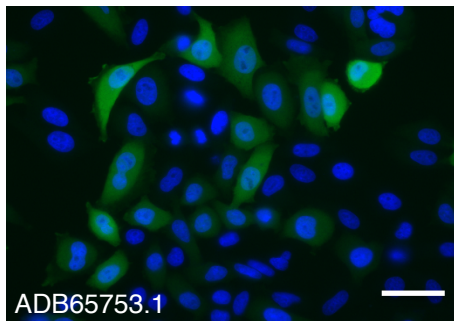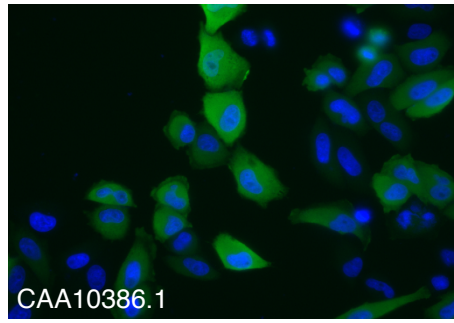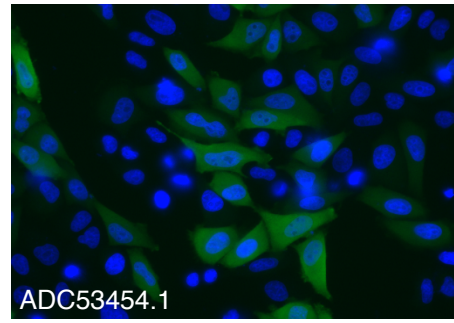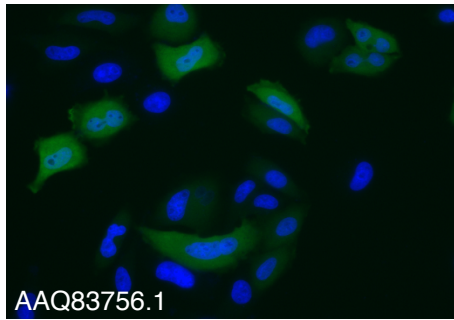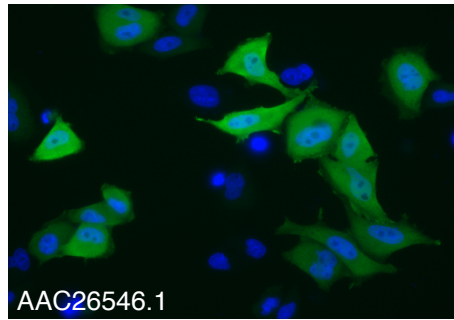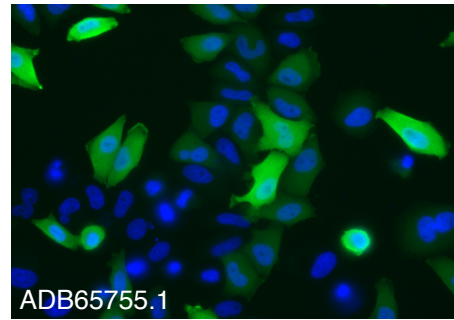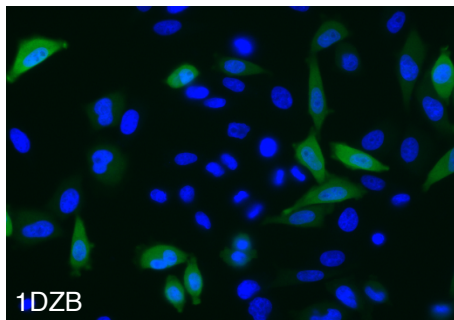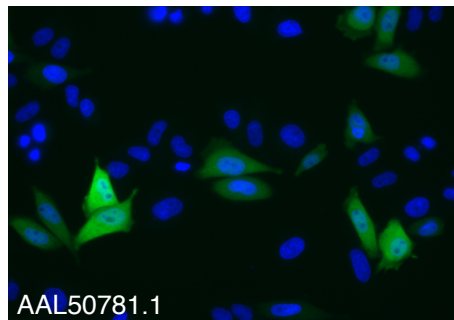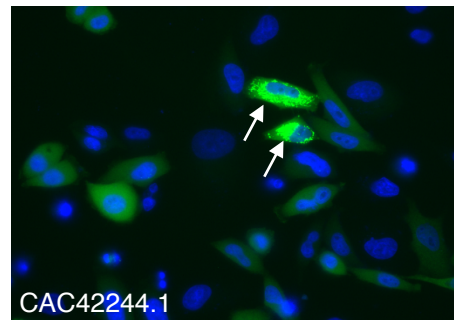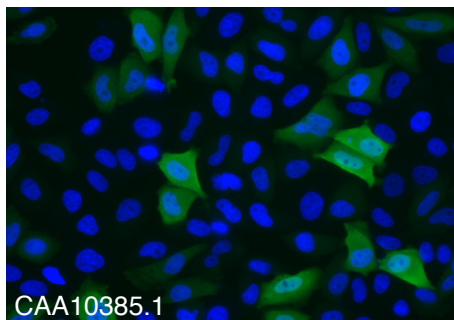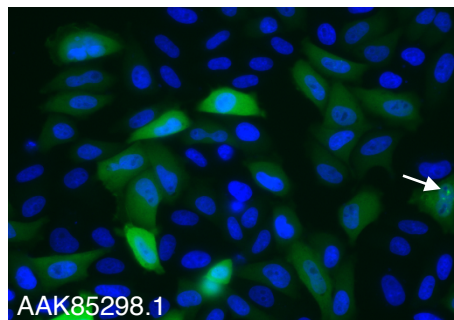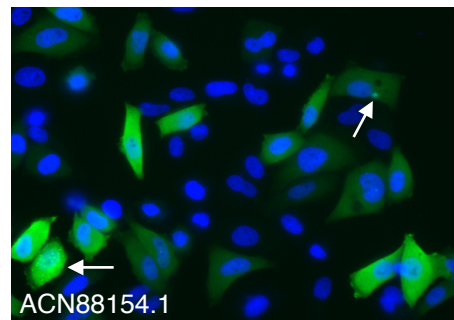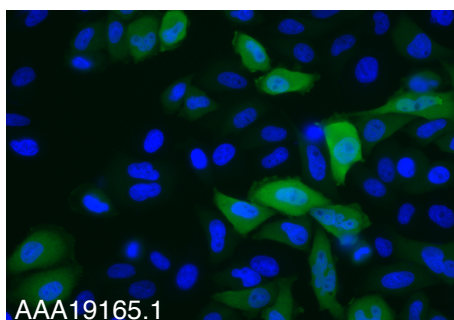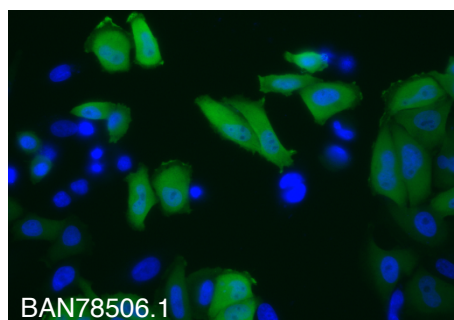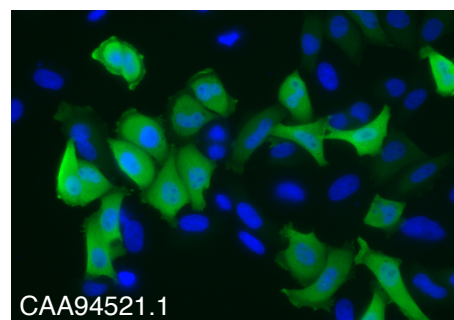

### **Supplementary Figure 3.**

#### **Aggregation rate of scFv proteins in HeLa cells.**

Fluorescent images of 15 s3Flag-scFv-HA constructs expressed in HeLa cells. The s3Flag-scFv-HA-expressing vectors were transfected into HeLa cells. The rate of cells with aggregates was measured via immunochemical analysis with anti-HA antibody to detect s3Flag-scFv-HA proteins. Arrows indicate cytoplasmic aggregates of scFv proteins. Scale bars, 50  $\mu\text{m}$ . The accession number of scFvs used is displayed in Supplementary Table 2. Source data are provided as a Source Data file.

# Supplementary Figure 4

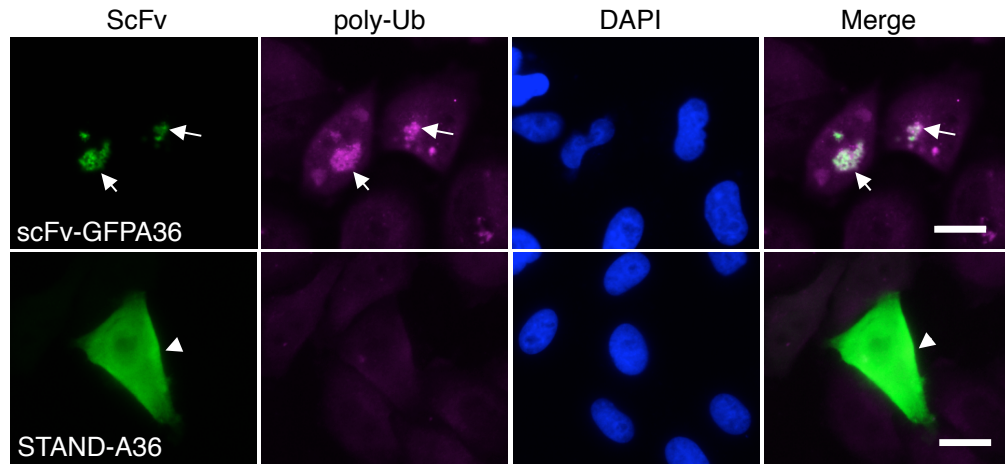

## Supplementary Figure 4.

**Co-localization of poly-ubiquitin with scFv-GFP A36 aggregates in HeLa cells.** Fluorescent images of scFv-GFP A36- (upper panels), or s3Flag-A36-HA- (lower panels) expressing HeLa cells. ScFvs were stained using anti-T7 antibody (upper left, green) or anti-HA antibody (lower left, green). Poly-ubiquitin was detected with anti-multi-ubiquitin antibody (magenta). Arrows indicate cytoplasmic aggregates of scFv-GFP A36 co-localised with poly-ubiquitin. Arrowheads indicate non-poly-ubiquitinated s3Flag-A36-HA stably expressed in the cytoplasm. Scale bar, 20  $\mu$ m.

# Supplementary Figure 5

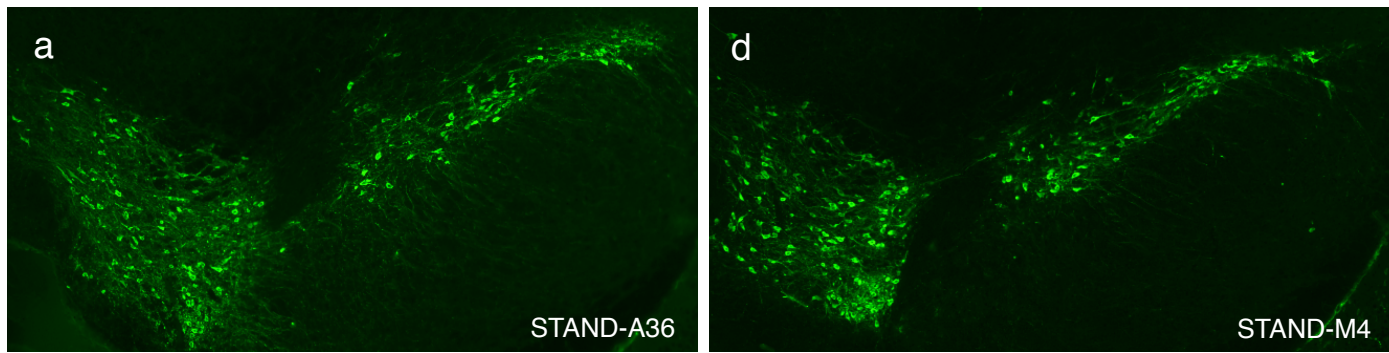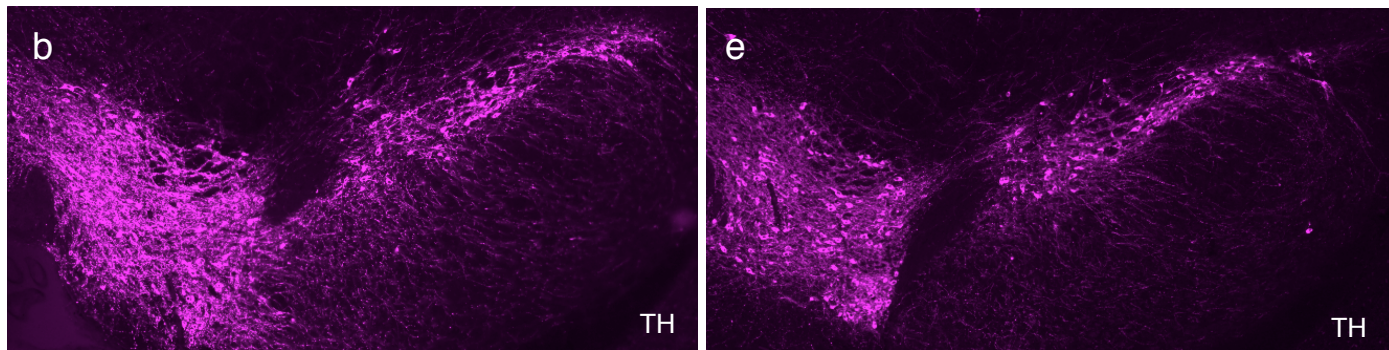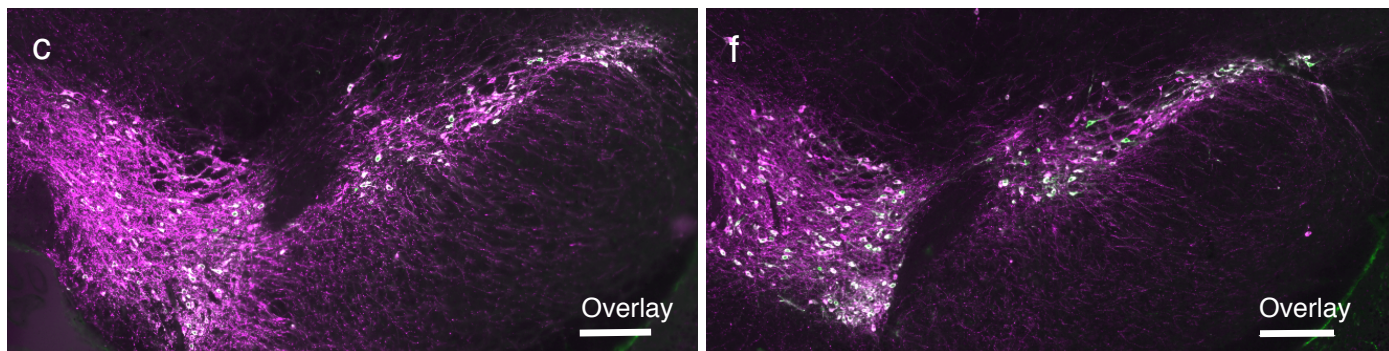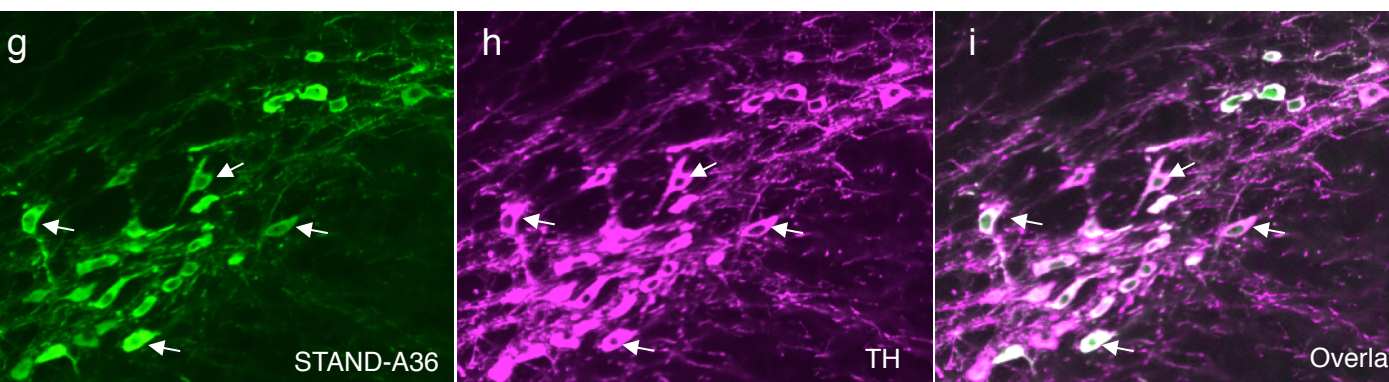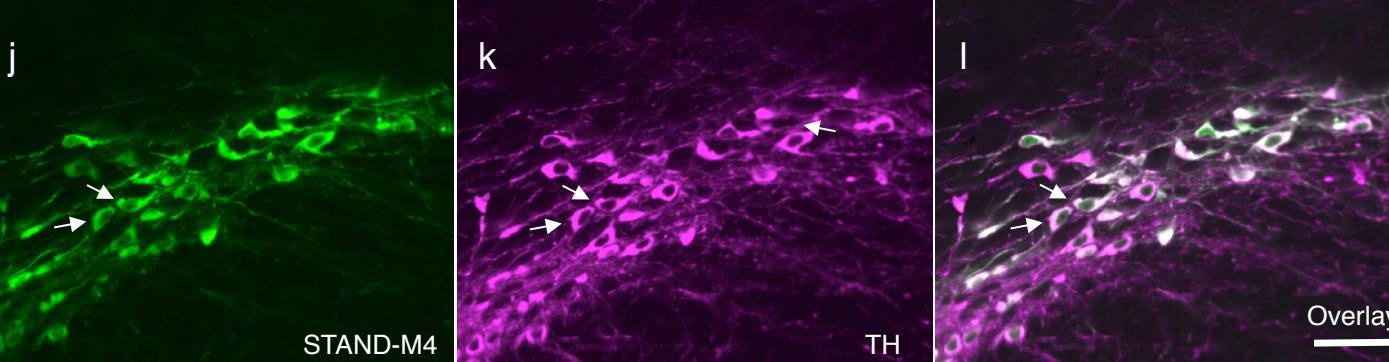



**Supplementary Figure 5.**

**Long-term expression of STAND proteins without aggregation in the SNc.**

Fluorescent images of the SNc 6 months after injection with AAV9/3-STAND-A36 (a–c) or AAV9/3-STAND-M4 (d–f). (g–l) Magnified images of the SNc region in a–c or d–f. STAND proteins were stably expressed in the cytoplasm of dopaminergic neurons (arrows). Scale bars, 200  $\mu\text{m}$  (c, f) and 50  $\mu\text{m}$  (l).

# Supplementary Figure 6

a

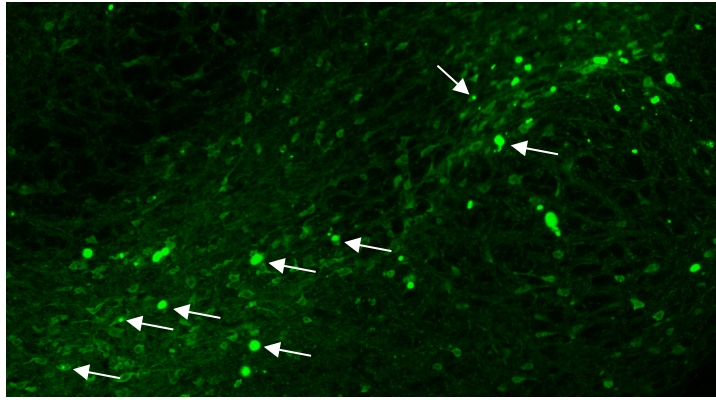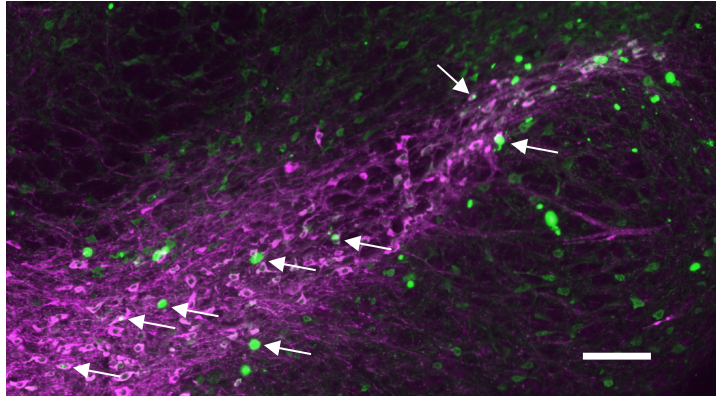

b

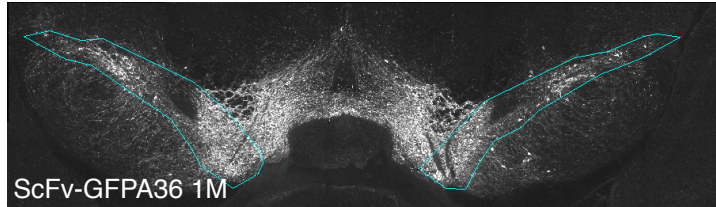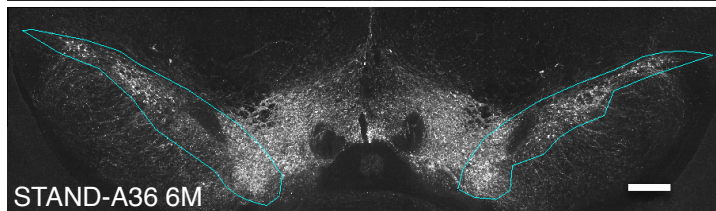

c

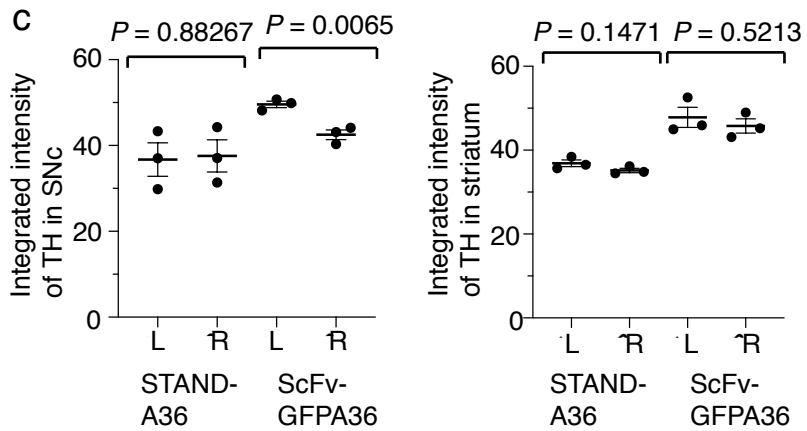

### Supplementary Figure 6.

**ScFv-GFPA36 causes aggregation and tyrosine hydroxylase reduction the SNc.** AAV-scFv-GFPA36 vectors ( $1 \times 10^9$  vg/mouse) were injected into the SNc region of the right cerebral hemisphere. Brains were fixed and analysed using immunohistochemistry 31 days after AAV injection. (a) Fluorescence micrographs of the SNc in the injected right hemisphere are shown. Upper panel: GFP in scFv-GFPA36 (green); lower panel: merged image of scFv-GFPA36 (green) and tyrosine hydroxylase (TH, magenta) expressed in dopaminergic neurons (magenta). ScFv-GFPA36 protein aggregated in the cytoplasm of some neurons (arrows). Scale bar, 100  $\mu$ m. (b) Fluorescence micrographs of TH in the SNc 31 days (lower, scFv-GFPA36) or 6 months (upper, STAND-A36) after AAV injection. Scale bar, 200  $\mu$ m. (c) Quantification of fluorescence intensity of TH in SNc (left panel) and striatum (right panel) of the right and left hemisphere. Note that TH expression in the SNc, not the striatum, of the right hemisphere injected with scFv-GFPA36-expressing AAV vectors was 85.74%, a statistically significant decrease when compared with that in the SNc of the non-injected left hemisphere. Statistical analyses were performed using a two-tailed unpaired *t*-test (Supplementary Table 1). Error bars represent standard error of the mean. Source data are provided as a Source Data file.

# Supplementary Figure 7

a

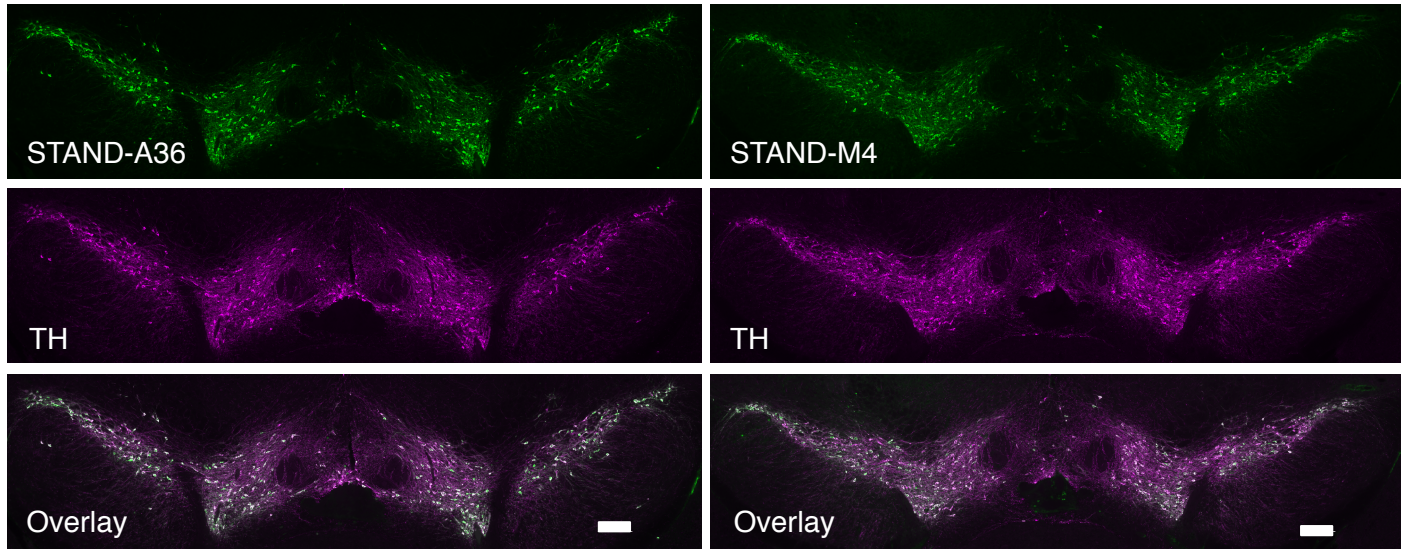

## Supplementary Figure 7.

**Bilateral expression of STAND-A36 and STAND-M4 in the SNc.** (a) Immunohistochemistry of SNc (Green, anti-Flag to detect STAND-A36 [upper left panel] or STAND-M4 [upper right panel]; red, anti-TH antibody to detect dopamine neurons). Scale bar, 200  $\mu\text{m}$ .

# Supplementary Figure 8

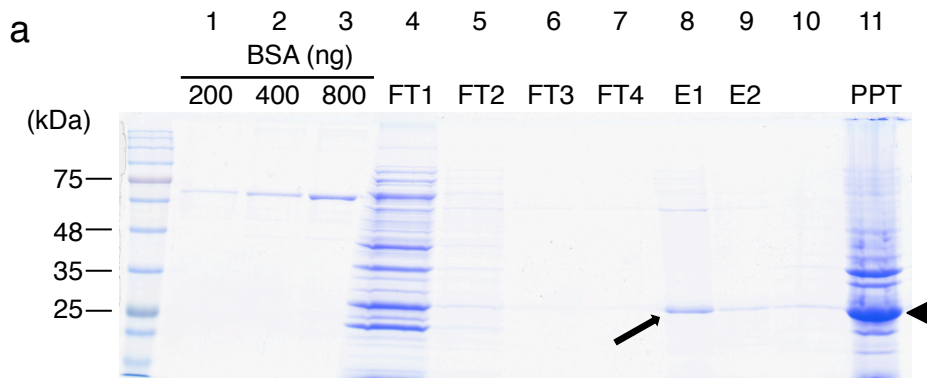

## Supplementary Figure 8.

**Low efficiency of soluble Myc-Y13-259 purification from *E.coli* cytoplasm.** (a) Lanes 1–3, indicate amounts of bovine serum albumin (BSA) as a standard protein; lanes 4–7, washing fractions; lane 8, first eluted fraction with myc peptide; lane 9, second eluted fraction with myc peptide; lane 10, no sample loaded; lane 11, Triton X-100-insoluble fraction (an arrowhead indicates aggregated Myc-Y13-259); Eluted Myc-Y13-259 is indicated by an arrow; molecular weight (kDa) is indicated on the left. Note that the amount of soluble Myc-Y13-259 (lane 8) obtained from 400 mL culture was approximately 10  $\mu$ g (0.1mg per ml); this is not sufficient to determine the protein stability with PSA, which requires at least 300  $\mu$ g of proteins for three independent experiments.

Supplementary Table 1

| Figure                          | Comparisons                  | F, P values                                          | Post-hocTest                          | P values    | Significance |
|---------------------------------|------------------------------|------------------------------------------------------|---------------------------------------|-------------|--------------|
| 1.d, A36:                       |                              |                                                      |                                       |             |              |
| T7, EGFP, His vs. s3Flag        | Two-tailed one-way ANOVA     | F (2, 6) = 834.2520, P < 0.00001                     | Tukey's multiple comparisons          | < 0.00001   | *****        |
| T7, EGFP, His vs. s3Flag, HA    | Two-tailed one-way ANOVA     | F (2, 6) = 834.2520, P < 0.00001                     | Tukey's multiple comparisons          | < 0.00001   | *****        |
| s3Flag vs. s3Flag, HA           | Two-tailed one-way ANOVA     | F (2, 6) = 834.2520, P < 0.00001                     | Tukey's multiple comparisons          | 0.0161      | *            |
| 1.d, M4:                        |                              |                                                      |                                       |             |              |
| T7, EGFP, His vs. s3Flag        | Two-tailed one-way ANOVA     | F (2, 6) = 180.6460, P < 0.00001                     | Tukey's post-hoc multiple comparisons | < 0.00001   | *****        |
| T7, EGFP, His vs. s3Flag, HA    | Two-tailed one-way ANOVA     | F (2, 6) = 180.6460, P < 0.00001                     | Tukey's post-hoc multiple comparisons | < 0.00001   | *****        |
| s3Flag vs. s3Flag, HA           | Two-tailed one-way ANOVA     | F (2, 6) = 180.6460, P < 0.00001                     | Tukey's post-hoc multiple comparisons | 0.0194      | *            |
| 2.a, pH 6.6                     | Correlation                  | Pearson r = 0.6181, R squared = 0.3821               |                                       | 0.008179    | **           |
| 2.a, pH 7.4                     | Correlation                  | Pearson r = 0.3709, R squared = 0.1376               |                                       | 0.14274     |              |
| 2.b                             | Correlation                  | Pearson r = 0.8392, R squared = 0.7042               |                                       | 0.00002542  | ****         |
| 3.h:                            |                              |                                                      |                                       |             |              |
| STAND-A36 vs. scFv-GFPA36       | Two-tailed one-way ANOVA     | F (2, 8) = 15.1284006, P = 0.00191216                | Tukey's post-hoc multiple comparisons | 0.001816727 | **           |
| STAND-A36 vs. scFv-T7-A36       | Two-tailed one-way ANOVA     | F (2, 8) = 15.1284006, P = 0.00191216                | Tukey's post-hoc multiple comparisons | 0.014650432 | *            |
| scFv-GFPA36 vs. scFv-T7-A36     | Two-tailed one-way ANOVA     | F (2, 8) = 15.1284006, P = 0.00191216                | Tukey's post-hoc multiple comparisons | 0.478268323 | n.s.         |
| 6.a:                            |                              |                                                      |                                       |             |              |
| GST vs. GST-Syt I-C2A           | Two-tailed one-way ANOVA     | F (2, 6) = 9632.99747329107, P = 0.00000000030177    | Tukey's post-hoc multiple comparisons | 6.6E-14     | ****         |
| GST vs. GST-Syt I-C2B           | Two-tailed one-way ANOVA     | F (2, 6) = 9632.99747329107, P = 0.00000000030177    | Tukey's post-hoc multiple comparisons | 0.220593866 | n.s.         |
| GST-Syt I-C2A vs. GST-Syt I-C2B | Two-tailed one-way ANOVA     | F (2, 6) = 9632.99747329107, P = 0.00000000030177    | Tukey's post-hoc multiple comparisons | 6.6E-14     | ****         |
| 6.e                             | Two-tailed Mann Whitney test |                                                      |                                       | 0.002164502 | **           |
| 6.h                             | Two-tailed unpaired t test   |                                                      |                                       | 0.031055716 | *            |
| 7.b:                            |                              |                                                      |                                       |             |              |
| M4 vs. A36                      | Two-tailed one-way ANOVA     | F (2, 14) = 9.2457, P = 0.002757                     | Tukey's post-hoc multiple comparisons | 0.0071      | **           |
| M4 vs. Non-injected             | Two-tailed one-way ANOVA     | F (2, 14) = 9.2457, P = 0.002757                     | Tukey's post-hoc multiple comparisons | 0.9352      | n.s.         |
| A36 vs. Non-injected            | Two-tailed one-way ANOVA     | F (2, 14) = 9.2457, P = 0.002757                     | Tukey's post-hoc multiple comparisons | 0.0079      | **           |
| 7.c:                            |                              |                                                      |                                       |             |              |
| Striatum                        | Two-tailed one-way ANOVA     | F (2, 15) = 0.5833, P = 0.5702                       | Tukey's post-hoc multiple comparisons |             | n.s.         |
| SN                              | Two-tailed one-way ANOVA     | F (2, 15) = 1.2156, P = 0.3241                       | Tukey's post-hoc multiple comparisons |             | n.s.         |
| 7.d                             |                              |                                                      |                                       |             |              |
| striatum (DOPAC)                | Two-tailed one-way ANOVA     | F (2, 15) = 0.995351739955074, P = 0.392734666340861 |                                       |             |              |
| SN (DOPAC)                      | Two-tailed one-way ANOVA     | F (2, 15) = 1.63394607458641, P = 0.228045313138747  |                                       |             |              |
| 7.e                             |                              |                                                      |                                       |             |              |
| striatum (HVA)                  | Two-tailed one-way ANOVA     | F (2, 15) = 1.07714613351408, P = 0.365500861163008  |                                       |             |              |
| SN (HVA)                        | Two-tailed one-way ANOVA     | F (2, 15) = 1.11438894209712, P = 0.353814724336619  |                                       |             |              |
| 8.a-d                           |                              |                                                      |                                       |             |              |
| Total distance                  | Two-tailed one-way ANOVA     | F (2, 19) = 0.688530660451682, P = 0.514415992105662 |                                       |             |              |
| Total center time:              |                              |                                                      |                                       |             |              |
| M4 vs. A36                      | Two-tailed one-way ANOVA     | F (2, 19) = 3.79839315463708, P = 0.040952663343881  | Tukey's post-hoc multiple comparisons | 0.612174388 | n.s.         |
| M4 vs. non-injected             | Two-tailed one-way ANOVA     | F (2, 19) = 3.79839315463708, P = 0.040952663343881  | Tukey's post-hoc multiple comparisons | 0.223909671 | n.s.         |
| A36 vs. non-injected            | Two-tailed one-way ANOVA     | F (2, 19) = 3.79839315463708, P = 0.040952663343881  | Tukey's post-hoc multiple comparisons | 0.033782325 | *            |

|                      |                          |                                                                                                                                                           |                                       |                       |       |
|----------------------|--------------------------|-----------------------------------------------------------------------------------------------------------------------------------------------------------|---------------------------------------|-----------------------|-------|
| Moving speed         | Two-tailed one-way ANOVA | F (2, 19) = 1.19391403575504, P = 0.324769852481788                                                                                                       |                                       |                       |       |
| Rearing              | Two-tailed one-way ANOVA | F (2, 19) = 0.403672202712696, P = 0.673456897081155                                                                                                      |                                       |                       |       |
| 8.e                  |                          |                                                                                                                                                           |                                       |                       |       |
| Day 1 vs. Day 5:     |                          |                                                                                                                                                           |                                       |                       |       |
| Non-injected         | Two-tailed two-way ANOVA | Interaction: F (8, 76) = 2.890, P=0.007267746908046, Time: F (2.771, 52.66) = 30.43, P = 0.00000000039300, Gene: F (2, 19) = 6.208, P = 0.008420081234325 | Tukey's post-hoc multiple comparisons | P = 0.007340023845199 | **    |
| M4                   | Two-tailed two-way ANOVA | Interaction: F (8, 76) = 2.890, P=0.007267746908046, Time: F (2.771, 52.66) = 30.43, P = 0.00000000039300, Gene: F (2, 19) = 6.208, P = 0.008420081234325 | Tukey's post-hoc multiple comparisons | P = 0.002306060695730 | **    |
| A36                  | Two-tailed two-way ANOVA | Interaction: F (8, 76) = 2.890, P=0.007267746908046, Time: F (2.771, 52.66) = 30.43, P = 0.00000000039300, Gene: F (2, 19) = 6.208, P = 0.008420081234325 | Tukey's post-hoc multiple comparisons | P = 0.088553834457845 | n.s.  |
| Day 5:               |                          |                                                                                                                                                           |                                       |                       |       |
| Non-injected vs. A36 | Two-tailed two-way ANOVA | Interaction: F (8, 76) = 2.890, P=0.007267746908046, Time: F (2.771, 52.66) = 30.43, P = 0.00000000039300, Gene: F (2, 19) = 6.208, P = 0.008420081234325 | Tukey's post-hoc multiple comparisons | P = 0.0247            | *     |
| Non-injected vs. M4  | Two-tailed two-way ANOVA | Interaction: F (8, 76) = 2.890, P=0.007267746908046, Time: F (2.771, 52.66) = 30.43, P = 0.00000000039300, Gene: F (2, 19) = 6.208, P = 0.008420081234325 | Tukey's post-hoc multiple comparisons | P = 0.9933            | n.s.  |
| A36 vs. M4           | Two-tailed two-way ANOVA | Interaction: F (8, 76) = 2.890, P=0.007267746908046, Time: F (2.771, 52.66) = 30.43, P = 0.00000000039300, Gene: F (2, 19) = 6.208, P = 0.008420081234325 | Tukey's post-hoc multiple comparisons | P = 0.0053            | **    |
| Day 1:               |                          |                                                                                                                                                           |                                       |                       |       |
| Non-injected vs. A36 | Two-tailed one-way ANOVA | Interaction: F (8, 76) = 2.890, P=0.007267746908046, Time: F (2.771, 52.66) = 30.43, P = 0.00000000039300, Gene: F (2, 19) = 6.208, P = 0.008420081234325 | Tukey's post-hoc multiple comparisons | P = 0.9630            | n.s.  |
| Non-injected vs. M4  | Two-tailed one-way ANOVA | Interaction: F (8, 76) = 2.890, P=0.007267746908046, Time: F (2.771, 52.66) = 30.43, P = 0.00000000039300, Gene: F (2, 19) = 6.208, P = 0.008420081234325 | Tukey's post-hoc multiple comparisons | P = 0.6099            | n.s.  |
| A36 vs. M4           | Two-tailed one-way ANOVA | Interaction: F (8, 76) = 2.890, P=0.007267746908046, Time: F (2.771, 52.66) = 30.43, P = 0.00000000039300, Gene: F (2, 19) = 6.208, P = 0.008420081234325 | Tukey's post-hoc multiple comparisons | P = 0.4678            | n.s.  |
| 9.c:                 |                          |                                                                                                                                                           |                                       |                       |       |
| Myc vs. s3Flag       | Two-tailed one-way ANOVA | F (2, 6) = 2110.0416, P < 0.00001                                                                                                                         | Tukey's post-hoc multiple comparisons | < 0.00001             | ***** |
| Myc vs. s3Flag, HA   | Two-tailed one-way ANOVA | F (2, 6) = 2110.0416, P < 0.00001                                                                                                                         | Tukey's post-hoc multiple comparisons | < 0.00001             | ***** |

|                                 |                            |                                    |                                       |           |              |
|---------------------------------|----------------------------|------------------------------------|---------------------------------------|-----------|--------------|
| s3Flag vs. s3Flag, HA           | Two-tailed one-way ANOVA   | F (2, 6) = 2110.0416, P < 0.00001  | Tukey's post-hoc multiple comparisons | 0.0141    | *            |
| 9.h:                            |                            |                                    |                                       |           |              |
| Mock vs. STAND-Y13-259          | Two-tailed one-way ANOVA   | F (2, 12) = 14.9438, P = 0.0005527 | Tukey's post-hoc multiple comparisons | 0.0009    | ***          |
| Mock vs. STAND-A36              | Two-tailed one-way ANOVA   | F (2, 12) = 14.9438, P = 0.0005527 | Tukey's post-hoc multiple comparisons | 0.8472    | n.s.         |
| STAND-Y13-259 vs. STAND-A36     | Two-tailed one-way ANOVA   | F (2, 12) = 14.9438, P = 0.0005527 | Tukey's post-hoc multiple comparisons | 0.0022    | **           |
| 10.c:                           |                            |                                    |                                       |           |              |
| STAND-Y13-259 vs. Myc-Y13-259   | Two-tailed one-way ANOVA   | F (3, 8) = 490.4608, P < 0.00001   | Tukey's post-hoc multiple comparisons | < 0.00001 | *****        |
| STAND-Y13-259 vs. STAND-A36     | Two-tailed one-way ANOVA   | F (3, 8) = 490.4608, P < 0.00001   | Tukey's post-hoc multiple comparisons | < 0.00001 | *****        |
| STAND-Y13-259 vs. PBS           | Two-tailed one-way ANOVA   | F (3, 8) = 490.4608, P < 0.00001   | Tukey's post-hoc multiple comparisons | < 0.00001 | *****        |
| Myc-Y13-259 vs. PBS             | Two-tailed one-way ANOVA   | F (3, 8) = 490.4608, P < 0.00001   | Tukey's post-hoc multiple comparisons | < 0.00001 | *****        |
| STAND-A36 vs. PBS               | Two-tailed one-way ANOVA   | F (3, 8) = 490.4608, P < 0.00001   | Tukey's post-hoc multiple comparisons | 0.0641    | n.s.         |
| 10.f:                           |                            |                                    |                                       |           |              |
| STAND-Y13-259 vs. Myc-Y13-259   | Kruskal-Wallis             | P = 0.0005310                      | Dann's post-hoc multiple comparisons  | 0.0052    | **           |
| Myc-Y13-259 vs. STAND-A36       | Kruskal-Wallis             | P = 0.0005310                      | Dann's post-hoc multiple comparisons  | > 0.99999 | n.s.         |
| STAND-Y13-259 vs. STAND-A36     | Kruskal-Wallis             | P = 0.0005310                      | Dann's post-hoc multiple comparisons  | 0.0269    | *            |
| Supplementary Figure            | Comparisons                | F, P values                        | Post-hocTest                          | P values  | Significance |
| 2.a. pH 7.4:                    |                            |                                    |                                       |           |              |
| No Tag vs. s3Flag, HA           | Two-tailed one-way ANOVA   | F (3, 372) = 130.8204, P < 0.00001 | Tukey's multiple comparisons          | < 0.00001 | *****        |
| No Tag vs. T7, EGFP, His        | Two-tailed one-way ANOVA   | F (3, 372) = 130.8204, P < 0.00001 | Tukey's multiple comparisons          | < 0.00001 | *****        |
| T7, EGFP, His vs. s3Flag, HA    | Two-tailed one-way ANOVA   | F (3, 372) = 130.8204, P < 0.00001 | Tukey's multiple comparisons          | < 0.00001 | *****        |
| T7, EGFP, His vs. s3Flag        | Two-tailed one-way ANOVA   | F (3, 372) = 130.8204, P < 0.00001 | Tukey's multiple comparisons          | < 0.00001 | *****        |
| s3Flag vs. s3Flag, HA           | Two-tailed one-way ANOVA   | F (3, 372) = 130.8204, P < 0.00001 | Tukey's multiple comparisons          | 0.0002    | ***          |
| 2.a. pH 6.6:                    |                            |                                    |                                       |           |              |
| No Tag vs. s3Flag, HA           | Two-tailed one-way ANOVA   | F (3, 372) = 134.3367, P < 0.00001 | Tukey's multiple comparisons          | < 0.00001 | *****        |
| No Tag vs. T7, EGFP, His        | Two-tailed one-way ANOVA   | F (3, 372) = 134.3367, P < 0.00001 | Tukey's multiple comparisons          | 0.3093    | n.s.         |
| T7, EGFP, His vs. s3Flag, HA    | Two-tailed one-way ANOVA   | F (3, 372) = 134.3367, P < 0.00001 | Tukey's multiple comparisons          | < 0.00001 | *****        |
| T7, EGFP, His vs. s3Flag        | Two-tailed one-way ANOVA   | F (3, 372) = 134.3367, P < 0.00001 | Tukey's multiple comparisons          | < 0.00001 | *****        |
| s3Flag vs. s3Flag, HA           | Two-tailed one-way ANOVA   | F (3, 372) = 134.3367, P < 0.00001 | Tukey's multiple comparisons          | 0.0002    | ***          |
| 2.b:                            |                            |                                    |                                       |           |              |
| No Tag vs. s3Flag, HA           | Two-tailed one-way ANOVA   | F (3, 372) = 184.7457, P < 0.00001 | Tukey's multiple comparisons          | < 0.00001 | *****        |
| T7, EGFP, His vs. s3Flag, HA    | Two-tailed one-way ANOVA   | F (3, 372) = 184.7457, P < 0.00001 | Tukey's multiple comparisons          | < 0.00001 | *****        |
| s3Flag vs. s3Flag, HA           | Two-tailed one-way ANOVA   | F (3, 372) = 184.7457, P < 0.00001 | Tukey's multiple comparisons          | 0.0056    | **           |
| 6.c:                            |                            |                                    |                                       |           |              |
| SN(STAND-A36, R vs. L)          | Two-tailed unpaired t test |                                    |                                       | 0.8827    | n.s.         |
| SN(scFv-GFPA36, R vs. L)        | Two-tailed unpaired t test |                                    |                                       | 0.0065    | **           |
| Striatum (STAND-A36, R vs. L)   | Two-tailed unpaired t test |                                    |                                       | 0.1471    | n.s.         |
| Striatum (scFv-GFPA36, R vs. L) | Two-tailed unpaired t test |                                    |                                       | 0.5213    | n.s.         |

**Supplementary Table 1.**

**The statistical tests, P values, F values, and significance for Figures and Supplementary Figures**

Detailed information for statistical analysis in the manuscript is shown.



Supplementary Table 2

|                              |                              |                              |
|------------------------------|------------------------------|------------------------------|
| IADC53452.1l:3-244           | IAAC26537.1l:1-228           | IADJ00222.1l:3-248           |
| IADB65759.1l:3-242           | ICCG26105.1l:20-266          | IACB88023.1l:1-242           |
| IADC53454.1l:3-243           | IAAC26550.1l:1-229           | IAAC26530.1l:1-231           |
| IAAC26528.1l:1-228           | ICAA10318.1l:3-248           | IACS12913.1l:3-240           |
| IADB65756.1l:3-244           | IS41374:1-247                | IAAL50781.1l:10-234          |
| IADB65755.1l:3-244           | IAAY88908.1l:3-240           | IAAA83267.1l:1-246           |
| IADB65753.1l:3-241           | ICAA10385.1l:1-243           | IACB97617.1l:3-238           |
| IAEK20780.1l:3-237           | IAAC04222.1l:39-276          | IAAP23214.1l:3-247           |
| IAAQ83756.1l:1-248           | IACZ65029.1l:3-236           | IAAY44382.2l:3-245           |
| I1DZBIA:1-239                | IAAC26540.1l:1-226           | IBAN78505.1l:8-247           |
| IADB65760.1l:3-238           | IADN42857.1l:25-265          | IBAA22843.1l:3-242           |
| ICAC14154.1l:2-247           | IACN88153.1l:3-241           | IAAB05768.1l:2-239           |
| IAEK20779.1l:3-242           | IACN88155.1l:3-241           | IBAN78507.1l:8-247           |
| I1QOKIA:27-268               | IAAX07566.1l:3-240           | IAF074900_1:3-245            |
| IBAT46707.1l:3-240           | IAAA19165.1l:23-265          | IAAQ83757.1l:1-241           |
| IADB65757.1l:3-241           | IAAK85297.1IAF402255_1:3-243 | IAAK85298.1IAF402256_1:3-248 |
| IAAY88907.1l:3-240           | ICAD58896.1l:3-233           | IAAK56283.1l:1-239           |
| IABN79462.1l:2-242           | IACA49232.1l:3-247           | IAAD33867.1IAF141321_1:3-243 |
| IADN42858.1l:25-265          | IADC53451.1l:3-248           | IAAB65160.1l:1-243           |
| IAAF82630.1l:3-243           | I5AAWIA:2-243                | IAAY44384.2l:3-245           |
| IAAD51317.1l:1-241           | IAAC26549.1l:1-232           | IBAN78506.1l:8-247           |
| IALJ99801.1l:3-251           | ICAA10386.1l:1-249           | IAEX60024.1l:43-282          |
| IAAC26545.1l:1-228           | IACB97619.1l:3-238           | IAAC25685.1l:1-239           |
| IAAN32896.1IAF488378_1:3-244 | IADC53455.1l:3-238           | IAAA75173.1l:23-270          |
| I3UYPIA:5-246                | IAAC26546.1l:1-232           | IAEX57225.1l:58-297          |
| IADB65758.1l:3-241           | ICAA94521.1l:1-248           | IAAL25135.1IAF434672_1:1-237 |
| IAAC52185.1l:3-242           | IAAF82631.1l:3-242           | IAAU10332.1l:22-271          |
| IADC53456.1l:3-246           | IAAF85943.1l:1-249           | IAHM25305.1l:3-249           |
| IAAU11282.1l:2-240           | ICCG26106.1l:20-263          | ICAC42244.1l:3-244           |
| IA56446:3-242                | IACV91950.1l:2-239           | IACN88154.1l:3-241           |
| ICAA82617.1l:1-247           | IAAG44840.1l:1-250           | IACN87219.1l:3-243           |
|                              |                              | JC5322:1-233                 |

Supplementary Table 2. Accession numbers of ScFv proteins used for in silico analysis.

Amino acid sequences of ScFv proteins were obtained using NCBI BLAST search for scFv-A36.

Supplementary Table 3

| REAGENT or RESOURCE                                                       | SOURCE                      | IDENTIFIER                                  |
|---------------------------------------------------------------------------|-----------------------------|---------------------------------------------|
| Antibodies                                                                |                             |                                             |
| Rabbit polyclonal anti-T7                                                 | MBL International           | Cat# PM022;<br>RRID:AB_592788               |
| Mouse monoclonal HRP-conjugated anti-T7                                   | Millipore                   | Cat#69048-3; RRID: AB_11212778              |
| Mouse monoclonal anti-Flag (M2)                                           | Sigma-Aldrich               | Cat# F3165; RRID:AB_259529                  |
| Mouse monoclonal anti-Flag (M2) conjugated beads                          | Sigma-Aldrich               | Cat#F2426; RRID: AB_2616449                 |
| Mouse monoclonal anti-HA conjugated beads                                 | Sigma-Aldrich               | Cat#A2095; RRID: AB_257974                  |
| Rabbit polyclonal anti-HA                                                 | Sigma-Aldrich               | Cat# H6908; RRID:<br>AB_260070              |
| Rabbit polyclonal anti-Myc                                                | MBL                         | Cat#562; RRID: AB_591105                    |
| Rabbit polyclonal anti-GFP                                                | MBL                         | Cat#598-7; RRID: AB_10597267                |
| Rabbit polyclonal anti-actin                                              | Sigma-Aldrich               | Cat#A2066; RRID: AB_476693                  |
| Rabbit polyclonal anti-tubulin                                            | Sigma-Aldrich               | Cat#T9026; RRID: AB_477593                  |
| Mouse monoclonal anti-MAP2                                                | Millipore                   | Cat#MAB3418; RRID: AB_94856                 |
| Mouse monoclonal anti-Syt I                                               | Enzo Life Sciences          | Cat#SYA-148F; RRID: AB_311976               |
| Chicken polyclonal anti-TH                                                | Abcam                       | Cat#ab76442; RRID: AB_1524535               |
| Rabbit polyclonal anti-TH                                                 | Millipore                   | Cat# AB152; RRID:AB_390204                  |
| Mouse monoclonal anti-Kras                                                | Santa cruz                  | Cat# sc-30 RRID:<br>AB_627865               |
| Goat polyclonal anti-rabbit IgG highly cross-<br>absorbed Alexa Fluor 488 | Thermo Fisher Scientific    | Cat# A-11034 also A11034<br>RRID:AB_2576217 |
| Goat polyclonal anti-mouse IgG highly cross-<br>absorbed Alexa Fluor 488  | Thermo Fisher Scientific    | Cat# A-11029 also A11029;<br>RRID:AB_138404 |
| Goat polyclonal anti-mouse IgG highly cross-<br>absorbed Alexa Fluor 594  | Thermo Fisher Scientific    | Cat# A-11032; RRID:AB_2534091               |
| Goat polyclonal anti-rabbit IgG highly cross-<br>absorbed Alexa Fluor 594 | Thermo Fisher Scientific    | Cat# A-11037; RRID:AB_2534095               |
| Goat polyclonal anti-chicken IgY Alexa Fluor 594                          | Thermo Fisher Scientific    | Cat# A-11042; RRID:AB_2534099               |
| HRP-anti-mouse IgG Light chain specific                                   | Jackson ImmunoResearch Labs | Cat# 115-035-174; RRID:AB_2338512           |
| HRP-anti-rabbit IgG Light chain specific                                  | Jackson ImmunoResearch Labs | Cat# 211-032-171; RRID:AB_2339149           |
| Murine IgG Control Antibody (mouse serum)                                 | Sigma-Aldrich               | Cat# I5381, RRID:AB_1163670                 |
| anti-His6 from mouse IgG1                                                 | Sigma-Aldrich               | Cat# 11922416001, RRID:AB_514486            |
| anti-multi ubiquitin(cloneFK2)                                            | MBL                         | Cat# D058-3, RRID:AB_592937                 |
| Goat anti-mouse (H+L)555                                                  | Abcam                       | Cat# 150118, RRID:AB_2714033                |
| HRP-anti-M13                                                              | GE Healthcare               | Cat# 27942101, RRID:AB_2616587              |

Supplementary Table 3.

**Antibodies used in this study**

The specificity of antibodies used was validated by suppliers, previous studies, or the current study.
