# Supplementary material for: An ultra-stable cytoplasmic antibody engineered for in vivo applications
Source: PubMed Central journal article supplement (PMC6969036; doi:10.1038/s41467-019-13654-9), 2020-01-17
Supplement: 41467_2019_13654_MOESM2_ESM.pdf [file 41467_2019_13654_MOESM2_ESM.pdf]

## Reporting Summary

Nature Research wishes to improve the reproducibility of the work that we publish. This form provides structure for consistency and transparency in reporting. For further information on Nature Research policies, see [Authors & Referees](#) and the [Editorial Policy Checklist](#).

### Statistical parameters

When statistical analyses are reported, confirm that the following items are present in the relevant location (e.g. figure legend, table legend, main text, or Methods section).

n/a Confirmed

- The exact sample size ( $n$ ) for each experimental group/condition, given as a discrete number and unit of measurement
- An indication of whether measurements were taken from distinct samples or whether the same sample was measured repeatedly
- The statistical test(s) used AND whether they are one- or two-sided  
*Only common tests should be described solely by name; describe more complex techniques in the Methods section.*
- A description of all covariates tested
- A description of any assumptions or corrections, such as tests of normality and adjustment for multiple comparisons
- A full description of the statistics including central tendency (e.g. means) or other basic estimates (e.g. regression coefficient) AND variation (e.g. standard deviation) or associated estimates of uncertainty (e.g. confidence intervals)
- For null hypothesis testing, the test statistic (e.g.  $F$ ,  $t$ ,  $r$ ) with confidence intervals, effect sizes, degrees of freedom and  $P$  value noted  
*Give  $P$  values as exact values whenever suitable.*
- For Bayesian analysis, information on the choice of priors and Markov chain Monte Carlo settings
- For hierarchical and complex designs, identification of the appropriate level for tests and full reporting of outcomes
- Estimates of effect sizes (e.g. Cohen's  $d$ , Pearson's  $r$ ), indicating how they were calculated
- Clearly defined error bars  
*State explicitly what error bars represent (e.g. SD, SE, CI)*

*Our web collection on [statistics for biologists](#) may be useful.*

### Software and code

Policy information about [availability of computer code](#)

|                 |                                                                                                                                                                                                                                           |
|-----------------|-------------------------------------------------------------------------------------------------------------------------------------------------------------------------------------------------------------------------------------------|
| Data collection | Fluorescent images of the cultured cells and brain sections were obtained by a Keyence BZ-9000 image acquisition software.                                                                                                                |
| Data analysis   | Fluorescent images of the cultured cells and brain sections were analyzed by a Keyence BZ analyzer software or ImageJ v.1.38e software. GraphPad Prism 8 software was used for statistical analysis, calculation of $K_d$ and $T_{1/2}$ . |

For manuscripts utilizing custom algorithms or software that are central to the research but not yet described in published literature, software must be made available to editors/reviewers upon request. We strongly encourage code deposition in a community repository (e.g. GitHub). See the Nature Research [guidelines for submitting code & software](#) for further information.

### Data

Policy information about [availability of data](#)

All manuscripts must include a [data availability statement](#). This statement should provide the following information, where applicable:

- Accession codes, unique identifiers, or web links for publicly available datasets
- A list of figures that have associated raw data
- A description of any restrictions on data availability

A reporting summary for this Article is available as a Supplementary Information file. The authors declare that the data for the graphs are available in the Source Data file. The other data that support the findings of this study are available within the article and its supplementary information files and from the corresponding

## Field-specific reporting

Please select the best fit for your research. If you are not sure, read the appropriate sections before making your selection.

Life sciences  Behavioural & social sciences  Ecological, evolutionary & environmental sciences

For a reference copy of the document with all sections, see [nature.com/authors/policies/ReportingSummary-flat.pdf](https://www.nature.com/authors/policies/ReportingSummary-flat.pdf)

## Life sciences study design

All studies must disclose on these points even when the disclosure is negative.

|                 |                                                                                                                                                                                                                                                                                                                                                                                       |
|-----------------|---------------------------------------------------------------------------------------------------------------------------------------------------------------------------------------------------------------------------------------------------------------------------------------------------------------------------------------------------------------------------------------|
| Sample size     | Sample size (n = number of animals or samples per group) was estimated using PS Power and Sample Size Calculation v.3.1.2 software 63 ( <a href="http://biostat.mc.vanderbilt.edu/wiki/Main/PowerSampleSize">http://biostat.mc.vanderbilt.edu/wiki/Main/PowerSampleSize</a> ; $\alpha = 0.05$ for two groups or 0.0166 for three groups, with a statistical power of $\beta = 0.8$ ). |
| Data exclusions | No data were excluded from the analysis in the present study.                                                                                                                                                                                                                                                                                                                         |
| Replication     | All attempts at replication were successful.                                                                                                                                                                                                                                                                                                                                          |
| Randomization   | Animals in behavior test were allocated at random.                                                                                                                                                                                                                                                                                                                                    |
| Blinding        | Investigators were not blinded to study to account for appropriate handling and data acquisition.                                                                                                                                                                                                                                                                                     |

## Reporting for specific materials, systems and methods

### Materials & experimental systems

|                                     |                                                                 |
|-------------------------------------|-----------------------------------------------------------------|
| n/a                                 | Involved in the study                                           |
| <input checked="" type="checkbox"/> | <input type="checkbox"/> Unique biological materials            |
| <input type="checkbox"/>            | <input checked="" type="checkbox"/> Antibodies                  |
| <input type="checkbox"/>            | <input checked="" type="checkbox"/> Eukaryotic cell lines       |
| <input checked="" type="checkbox"/> | <input type="checkbox"/> Palaeontology                          |
| <input type="checkbox"/>            | <input checked="" type="checkbox"/> Animals and other organisms |
| <input checked="" type="checkbox"/> | <input type="checkbox"/> Human research participants            |

### Methods

|                                     |                                                 |
|-------------------------------------|-------------------------------------------------|
| n/a                                 | Involved in the study                           |
| <input checked="" type="checkbox"/> | <input type="checkbox"/> ChIP-seq               |
| <input checked="" type="checkbox"/> | <input type="checkbox"/> Flow cytometry         |
| <input checked="" type="checkbox"/> | <input type="checkbox"/> MRI-based neuroimaging |

## Antibodies

### Antibodies used

Mouse monoclonal anti-T7: Millipore, Cat#69522-3, RRID: AB\_11211744,  
 Mouse monoclonal HRP-conjugated anti-T7: Millipore, Cat#69048-3 RRID: AB\_11212778,  
 Mouse monoclonal anti-Flag (M2): Sigma-Aldrich, Cat#P2983, RRID: AB\_439685,  
 Mouse monoclonal anti-Flag (M2) conjugated beads: Sigma-Aldrich, Cat#F2426, RRID: AB\_2616449,  
 Mouse monoclonal anti-HA: Sigma-Aldrich, Cat#A2095, RRID: AB\_257974,  
 Mouse monoclonal anti-HA conjugated beads: Sigma-Aldrich Cat#A2095, RRID: AB\_257974,  
 Rabbit polyclonal anti-HA: Sigma-Aldrich, Cat# H6908, RRID: AB\_260070,  
 Rabbit polyclonal anti-Myc: MBL, Cat#562, RRID: AB\_591105,  
 Goat polyclonal anti-GST: GE Healthcare, Cat#27-4577-01, RRID: AB\_771432,  
 Goat polyclonal HRP-conjugated anti-GST: GE Healthcare, Cat#RPN1236, RRID: AB\_771429,  
 Rabbit polyclonal anti-GFP: MBL, Cat#598-7, RRID: AB\_10597267,  
 Rabbit polyclonal anti-actin: Sigma-Aldrich, Cat#A2066, RRID: AB\_476693,  
 Rabbit polyclonal anti-tubulin: Sigma-Aldrich, Cat#T9026, RRID: AB\_477593,  
 Mouse monoclonal anti-MAP2: Millipore, Cat#MAB3418, RRID: AB\_94856,  
 Mouse monoclonal anti-Syt I: Enzo Life Sciences, Cat#SYA-148F, RRID: AB\_311976,  
 Chicken polyclonal anti-TH: Abcam, Cat#ab76442, RRID: AB\_1524535,  
 Mouse monoclonal anti-Kras: Santa cruz, Cat# sc-30 RRID, AB\_627865,  
 Goat polyclonal anti-rabbit IgG highly cross-absorbed Alexa Fluor 488: Thermo Fisher Scientific, Cat# A-11034 also A11034, RRID:AB\_2576217,

Goat polyclonal anti-mouse IgG highly cross-absorbed Alexa Fluor 488: Thermo Fisher Scientific, Cat# A-11029 also A11029, RRID:AB\_138404,  
 HRP-anti-M13: GE Healthcare, Cat# 27942101, RRID:AB\_2616587  
 Goat polyclonal anti-mouse IgG highly cross-absorbed Alexa Fluor 594: Thermo Fisher Scientific, Cat# A-11032, RRID:AB\_2534091,  
 Goat polyclonal anti-chicken IgY Alexa Fluor 594: Thermo Fisher Scientific, Cat# A-11042, RRID:AB\_2534099,  
 HRP-anti-mouse IgG Light chain specific: Jackson ImmunoResearch Labs, Cat# 115-035-174, RRID:AB\_2338512,  
 Murine IgG Control Antibody (mouse serum): Sigma-Aldrich, Cat# I5381, RRID:AB\_1163670  
 anti-His6 from mouse IgG1: Sigma-Aldrich, Cat# 11922416001, RRID:AB\_514486  
 anti-multi ubiquitin(cloneFK2): MBL, Cat# D058-3, RRID:AB\_592937  
 Goat anti-mouse (H+L)555 Abcam, Cat# 150118, RRID:AB\_2714033

Validation

Specificity of antibodies used was validated by suppliers, previous studies, or the current study.

## Eukaryotic cell lines

Policy information about [cell lines](#)

Cell line source(s)

HEK293T, HeLa-S3, and COS-7 cells and highly malignant MIA PaCa-2 pancreatic adenocarcinoma cells obtained from RIKEN Bioresource Center Cell Bank (Tsukuba, Japan)

Authentication

We declare that none of the cell lines used were authenticated.

Mycoplasma contamination

RIKEN Bioresource Center Cell Bank confirmed that all cell lines tested negative for mycoplasma contamination.

Commonly misidentified lines  
(See [ICLAC](#) register)

No misidentified lines were used in this study.

## Animals and other organisms

Policy information about [studies involving animals](#); [ARRIVE guidelines](#) recommended for reporting animal research

Laboratory animals

Balb/c for immunization (female, age: 2 months ), Balb/c-nu (male, age: 6 weeks) for xenograft, C57B6/J (male) for AAV injection (age: 2 months) and behavior test (age: 3 months).

Wild animals

This study did not involve wild animals

Field-collected samples

This study did not involve samples collected in the field.
